# Supplementary material for: Bioengineering tunable porosity in bacterial nanocellulose matrices
Source: Royal Society of Chemistry journal article supplement (doi:10.1039/c9sm01895f), 2019-01-01
Supplement: c9sm01895f1.pdf [file c9sm01895f1.pdf]

**Table S1.** Effect of different types of carbon sources on yield, water flux, thickness, and density of BC membranes.

| Sample                                            | Mannitol   | Fructose   | Sucrose    | Glycerol   | Glucose    |
|---------------------------------------------------|------------|------------|------------|------------|------------|
| <b>BC Yield<br/>(g L<sup>-1</sup>)</b>            | 0.95±0.003 | 1.82±0.003 | 0.7±0.001  | 2.05±0.003 | 0.42±0.001 |
| <b>Flux<br/>(kg/m<sup>2</sup>h)</b>               | 12.4±2.5   | 18.7±1.7   | 10.9±1.1   | 27.5±0.67  | 8.6±1.4    |
| <b>Thickness<br/>(mm)</b>                         | 0.26±0.078 | 0.46±0.191 | 0.70±0.130 | 0.76±0.137 | 0.21±0.042 |
| <b>Density<sup>1</sup><br/>(g/cm<sup>3</sup>)</b> | 0.04±0.013 | 0.05±0.018 | 0.01±0.002 | 0.03±0.005 | 0.02±0.003 |

**Table S2.** Results of Bubble Point and Capillary Flow Porometry tests on BC membranes obtained from different carbon source.

| Sample                                 | Mannitol | Fructose | Sucrose | Glycerol | Glucose |
|----------------------------------------|----------|----------|---------|----------|---------|
| <b>Bubble Point<br/>Pressure (psi)</b> | 9.3280   | 7.863    | 1.506   | 10.477   | 20.183  |
| <b>Bubble Point<br/>Diameter (μ)</b>   | 0.7074   | 0.8392   | 4.3807  | 0.6298   | 0.3269  |

<sup>1</sup> The density as calculated from the mass and volume of the membranes.

|                                            |             |             |             |             |             |
|--------------------------------------------|-------------|-------------|-------------|-------------|-------------|
| <b>Mean Flow Pore Pressure (psi)</b>       | 29.402      | 11.206      | 72.818      | 10.646      | 73.752      |
| <b>Mean Flow Pore Diameter (μ)</b>         | 0.22±0.1608 | 0.59±0.4661 | 0.09±0.6794 | 0.62±0.5067 | 0.09±0.0609 |
| <b>Smallest Detected Pore Diameter (μ)</b> | 0.0659      | 0.1992      | ----        | 0.1974      | ----        |

---
